# Supplementary material for: Acceleration of Oral Wound Healing under Diabetes Mellitus Conditions Using Bioadhesive Hydrogel
Source: PubMed Central journal article supplement — ACS Appl Mater Interfaces. 2022 Dec 23;15(1):416–31. doi: 10.1021/acsami.2c17424 (PMC9837818; doi:10.1021/acsami.2c17424), 2022-12-23
Supplement: am2c17424_si_001.pdf [file am2c17424_si_001.pdf]

## Supporting Information

### Acceleration of Oral Wound Healing under Diabetes Mellitus by Bio-adhesive Hydrogel

Jiwei Sun, PhD<sup>1,2,3†</sup>, Tiantian Chen, PhD<sup>5†</sup>, Baoying Zhao, MS<sup>1,2,3†</sup>, Wenjie Fan, MS<sup>1,2,3</sup>, Yufeng Shen, PhD<sup>1,2,3</sup>, Haojie Wei, MS<sup>4</sup>, Man Zhang, MS<sup>1,2,3</sup>, Wenhao Zheng, PhD<sup>1,2,3</sup>, Jinfeng Peng, PhD<sup>1,2,3</sup>, Jinyu Wang, PhD<sup>1,2,3</sup>, Yifan Wang, PhD<sup>1,2,3</sup>, Lihong Fan, PhD<sup>4</sup>, Yingying Chu, PhD<sup>4\*</sup>, Lili Chen, PhD<sup>1,2,3\*</sup>, Cheng Yang, PhD<sup>1,2,3\*</sup>

<sup>1</sup>Department of Stomatology, Union Hospital, Tongji Medical College, Huazhong University of Science and Technology, Wuhan 430022, China

<sup>2</sup>School of Stomatology, Tongji Medical College, Huazhong University of Science and Technology, Wuhan 430030, China

<sup>3</sup>Hubei Province Key Laboratory of Oral and Maxillofacial Development and Regeneration, Wuhan 430022, China

<sup>4</sup>School of Chemistry, Chemical Engineering and Life Sciences, Wuhan University of Technology, Wuhan 430070, P. R. China.

<sup>5</sup>School of Resources and Environmental Engineering, Wuhan University of Technology, Wuhan 430070, China

**\*Emails:** y.chu@whut.edu.cn (Yingying Chu)

chenlili1030@hust.edu.cn (Lili Chen)

yangc715@126.com (Cheng Yang)

## Supplementary Figures and Figure Legends

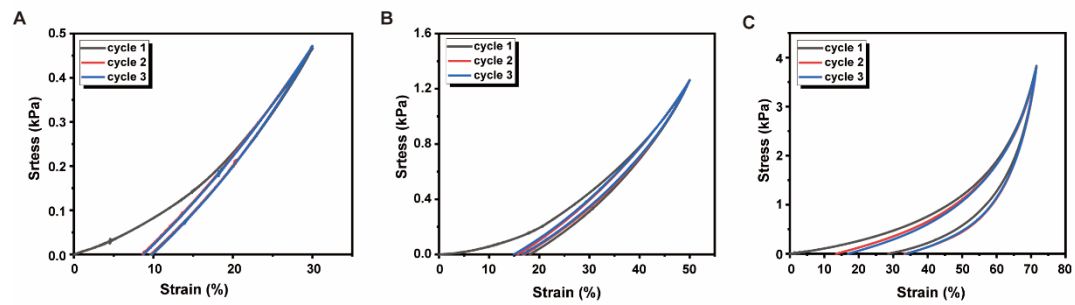

**Figure S1.** Repeated compressive tests of the Fe-TA@ P(AM-AA) hydrogel three times at A)30%, B)50%, and C)70% strain, separately.

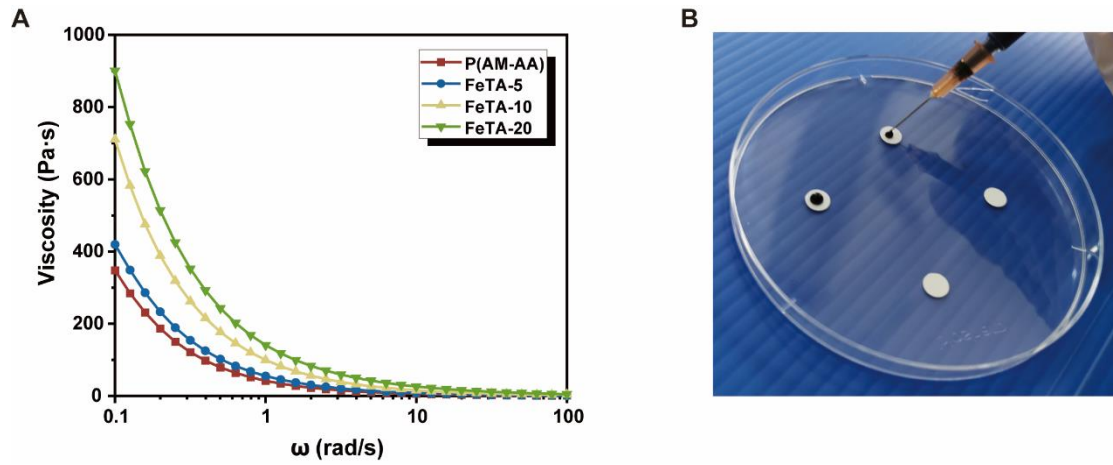

**Figure S2. Injectability properties of the Fe-TA@ P(AM-AA) hydrogel.**

A) Shear-thinning behavior of the Fe-TA@ P(AM-AA) hydrogel.

B) Photograph of injectability properties of the Fe-TA@ P(AM-AA) hydrogel.

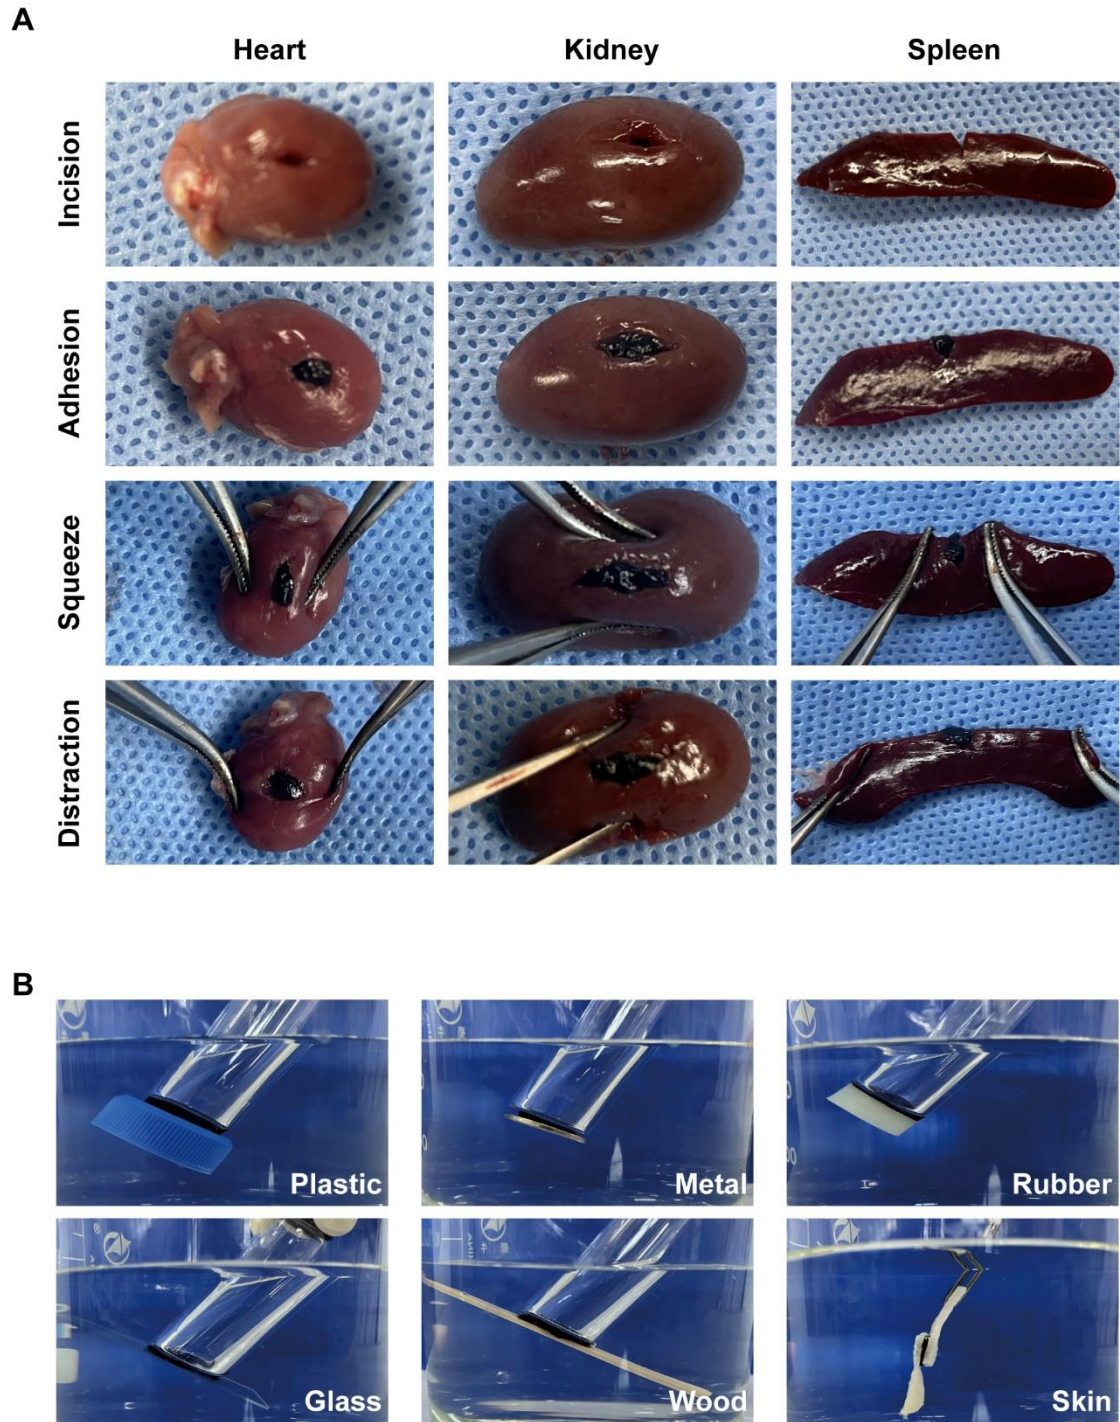

**Figure S3. Wet adhesion of Fe-TA@P(AM-AA).**

A) Photographs of the adhesiveness of Fe-TA@P(AM-AA) (10%wt) hydrogel to the incisions on fresh rat heart, kidney and spleen.

B) Photographs of the adhesiveness of Fe-TA@P(AM-AA) (10%wt) hydrogel to different materials.

**Relaxed**

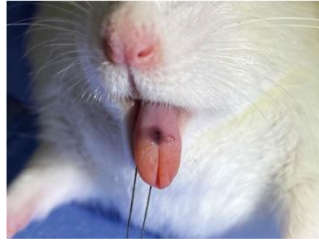

**Figure S4.** Fe-TA@P(AM-AA) remained adhering on the surface of wet rat tongue after tongue movement.

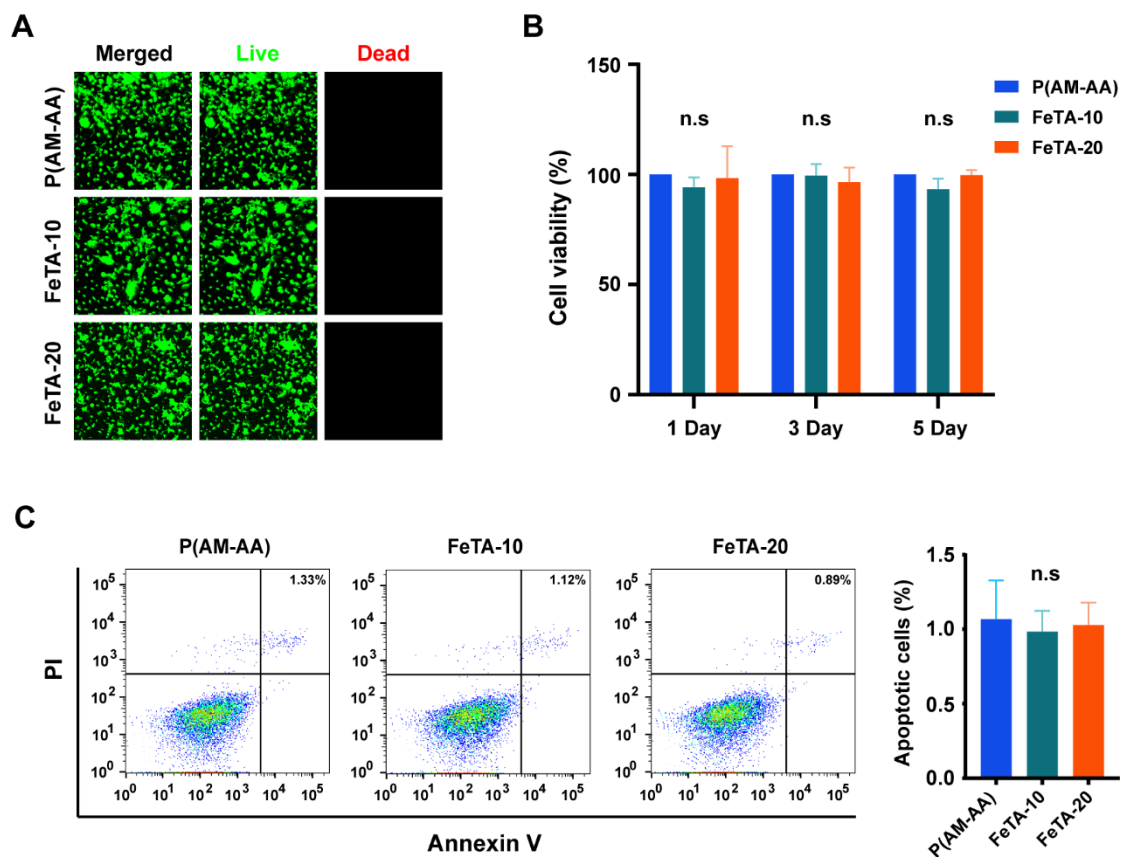

**Figure S5. Cytocompatibility of the Fe-TA@P(AM-AA) hydrogel.**

A) Live/Dead staining fluorescent images of oral epithelial cells after incubation with the Fe-TA@P(AM-AA) extracts under high glucose medium for 48 h.

B) Oral epithelial cells were co-cultured with Fe-TA@P(AM-AA) extracts under high glucose medium, and cell proliferation activity was assessed with CCK-8 assays after 1, 3 and 5 days.

C) Apoptosis status of oral epithelial cells measured by Annexin V/PI flow cytometry analysis.

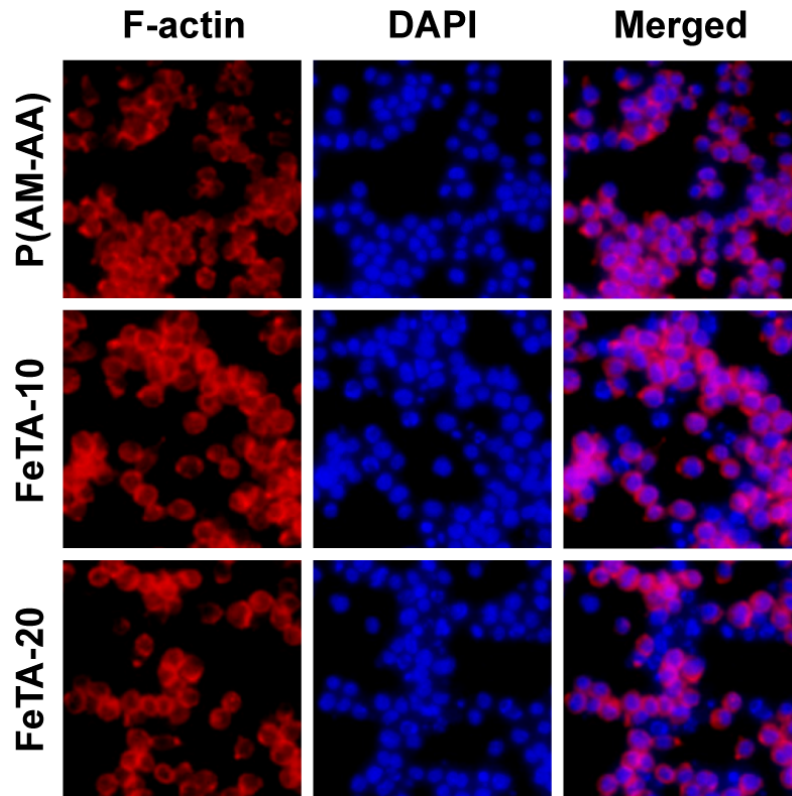

**Figure S6. Cell adhesion and spreading on composite hydrogels.**

Cytoskeletal staining of macrophages co-cultured with Fe-TA@P(AM-AA) extracts for 48 h.

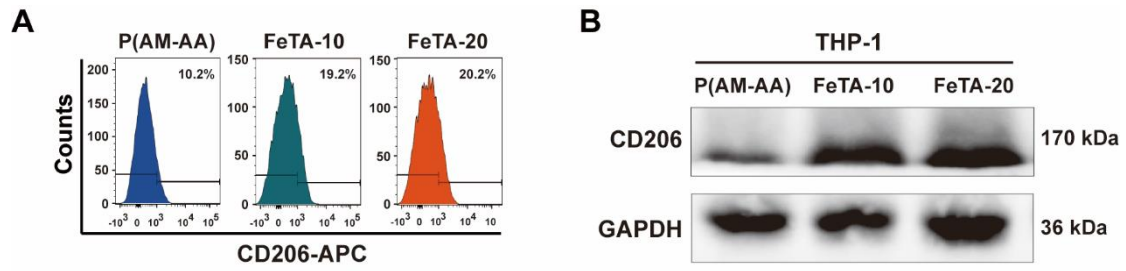

5

**Figure S7. Immunomodulatory potential of composite hydrogels on macrophage polarization**

A) Flow cytometry analysis of the percentage of CD206+ M2 macrophages.

B) Western blotting analysis of the protein expression level of M2 marker CD206.



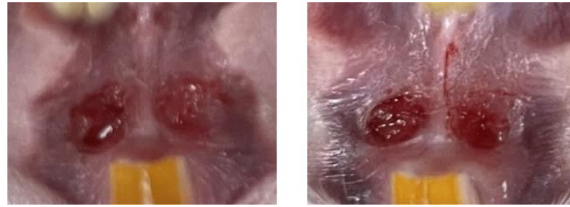

**Figure S8.** Oral mucosa defects above the muscle tissue with the same size (1.2 mm diameter) were created in the diabetic rat.

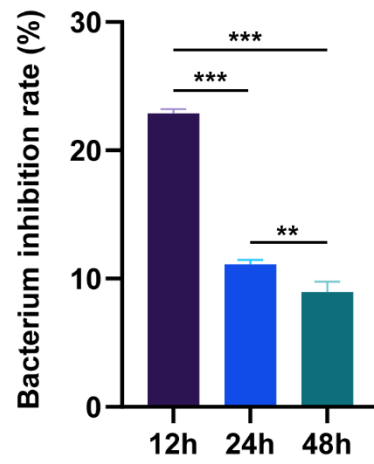

**Figure S9.** Antibacterial effect of Fe-TA@P(AM-AA) gel on rat oral mucosa defects were analyzed at different time points.

## *Supplementary Tables*

**Table 1 Primers and parameters used for the PCR analysis**

| Gene Name                       | Primer sequence                                                                     |
|---------------------------------|-------------------------------------------------------------------------------------|
| <i>h-IL10</i>                   | Forward: 5'-GACTTTAAGGGTTACCTGGGTTG -3'<br>Reverse: 5'-TCACATGCGCCTTGATGTCTG -3'    |
| <i>h-IL4</i>                    | Forward: 5'-AGGCTGAAAGGGGGAAAGC -3'<br>Reverse: 5'-CTGTTCACCTCAACTGCTCC -3'         |
| <i>h-CCL2</i>                   | Forward: 5'-ATCCAGCACACGAATACACA -3'<br>Reverse: 5'-AAAGTTCTTTGAGTTGCGGC -3'        |
| <i>h-IL1<math>\beta</math></i>  | Forward: 5'-ATGATGGCTTATTACAGTGGCAA -3'<br>Reverse: 5'-GTCGGAGATTCGTAGCTGGA -3'     |
| <i>h-IL6</i>                    | Forward: 5'-ACTCACCTCTTCAGAACGAATTG -3'<br>Reverse: 5'-CCATCTTTGGAAGGTTTCAGGTTG -3' |
| <i>h-TNF<math>\alpha</math></i> | Forward: 5'-CCTCTCTCTAATCAGCCCTCTG -3'<br>Reverse: 5'-GAGGACCTGGGAGTAGATGAG -3'     |
